# Supplementary material for: A Call for More Snow Sampling
Source: MDPI journal article supplement (doi:10.3390/geosciences11110435), 2021-10-21
Supplement: s1 [file s1]

## Supplementary Materials

**Table S1.** October 2020 snowfall event in Fort Collins Colorado USA and used for Figure 3.

| Location Around the House | Snow Depth [cm] | SWE [mm] |
|---------------------------|-----------------|----------|
| north 1                   | 22.6            | 22.7     |
| north 2                   | 22.2            | 22       |
| east 1                    | 22.2            | 22.5     |
| east 2                    | 22              | 23       |
| west 1                    | 25.4            | 25.5     |
| west 2                    | 25              | 27       |
| south 1                   | 30              | 31       |
| south 2                   | 29              | 30.5     |

**Table S2.** (a) Preferential snowmelt snow depth and SWE snow core data for several layers/intervals at 11 locations shown in Figure 4e. These data were used to estimate the bulk measurements shown in Figures 4b–d. Data were collected on 18 April 2020 in Fort Collins Colorado USA; (b) Preferential snowmelt snow depth and SWE trench data shown in Figures 4b–d. Data were collected on 18 April 2020 in Fort Collins Colorado USA.

| (a)                           |                                                 |                                                  |                          |                   |
|-------------------------------|-------------------------------------------------|--------------------------------------------------|--------------------------|-------------------|
| Distance From South Edge [cm] | Lower Height Above the Ground for Interval [cm] | Higher Height Above the Ground for Interval [cm] | Interval Snow Depth [cm] | Interval SWE [mm] |
| 175                           | 13.4                                            | 15.7                                             | 2.3                      | 9.9               |
|                               | 2.9                                             | 13.4                                             | 10.5                     | 15.3              |
|                               | 1.2                                             | 2.9                                              | 1.7                      | 2.9               |
|                               | 0                                               | 1.2                                              | 1.2                      | 4.6               |
| 177.5                         | 12.8                                            | 15.5                                             | 2.7                      | 9.6               |
|                               | 1.5                                             | 12.8                                             | 11.3                     | 20.0              |
|                               | 0                                               | 1.5                                              | 1.5                      | 4.4               |
| 148                           | 15.8                                            | 17.8                                             | 2                        | 6.4               |
|                               | 1.4                                             | 15.8                                             | 14.4                     | 21.7              |
|                               | 0                                               | 1.4                                              | 1.4                      | 4.8               |
| 130                           | 18.3                                            | 20                                               | 1.7                      | 3.7               |
|                               | 1.1                                             | 18.3                                             | 17.2                     | 25.4              |
|                               | 0                                               | 1.1                                              | 1.1                      | 2.9               |
| 116                           | 12.5                                            | 23.8                                             | 11.3                     | 14.7              |
|                               | 1                                               | 12.5                                             | 11.5                     | 18.0              |
|                               | 0                                               | 1                                                | 1                        | 3.1               |
| 99                            | 1.5                                             | 22.9                                             | 21.4                     | 31.6              |
|                               | 0                                               | 1.5                                              | 1.5                      | 4.2               |
| 87                            | 15.8                                            | 17.8                                             | 1.6                      | 5.7               |
|                               | 1.4                                             | 15.8                                             | 14.4                     | 20.2              |
|                               | 0                                               | 1.4                                              | 1.4                      | 4.6               |
| 74                            | 15.6                                            | 17.4                                             | 1.8                      | 7.9               |
|                               | 1.4                                             | 15.6                                             | 14.2                     | 20.0              |
|                               | 0                                               | 1.4                                              | 1.4                      | 4.4               |
| 60                            | 18.4                                            | 20                                               | 1.6                      | 5.5               |
|                               | 1.4                                             | 18.4                                             | 17                       | 24.6              |

|    |      |      |      |      |
|----|------|------|------|------|
|    | 0    | 1.4  | 1.4  | 5.3  |
| 47 | 21.9 | 23   | 1.1  | 3.9  |
|    | 12.9 | 21.9 | 9    | 10.3 |
|    | 1.4  | 12.9 | 11.5 | 17.8 |
|    | 0    | 1.4  | 1.4  | 5.3  |
| 23 | 1.4  | 23   | 21.6 | 36.2 |
|    | 0    | 1.4  | 1.4  | 5.5  |

(b)

| Start Distance From the<br>South Edge [cm] | End Distance From the<br>South Edge [cm] | Trench Depth<br>[cm] | Trench SWE<br>[mm] |
|--------------------------------------------|------------------------------------------|----------------------|--------------------|
| 138                                        | 128.5                                    | 19.3                 | 33.8               |
| 128.5                                      | 117.5                                    | 22.4                 | 32.9               |
| 117.5                                      | 109.5                                    | 23.5                 | 39.0               |
| 109.5                                      | 95                                       | 22.8                 | 33.8               |
| 95                                         | 84.5                                     | 16.9                 | 32.3               |
| 84.5                                       | 71.5                                     | 16.2                 | 31.1               |
| 71.5                                       | 57                                       | 19.4                 | 34.4               |
| 57                                         | 45                                       | 21.9                 | 36.5               |
| 45                                         | 31.5                                     | 23.1                 | 45.9               |
| 31.5                                       | 23                                       | 21.6                 | 58.4               |
| 23                                         | 15                                       | 21.3                 | 52.0               |

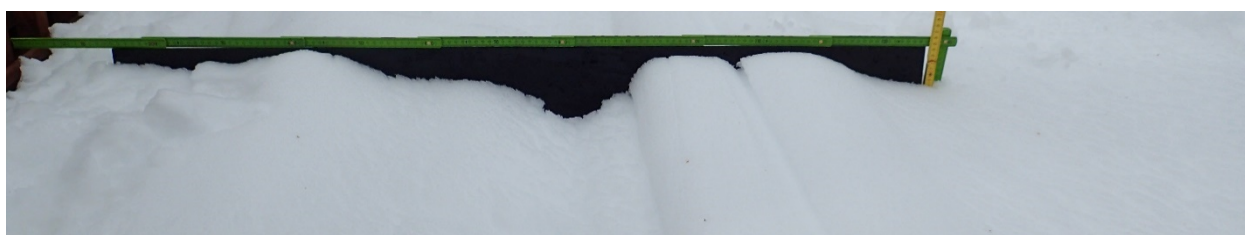

**Figure S1.** Preferential snowmelt snow depth image shown in Figure 4a and presented as data in Figures 4b–e. Image was taken by the author with an Olympus Tough TG-3 (Tokyo, Japan) on 18 April 2020 in Fort Collins Colorado USA.

**Table S3.** NRCS snowcourse and additional snow depth measurements collected adjacent to the individual Federal Sampler measurements along the Cameron Pass snowcourse on 1 April 2009.

| Snowcourse<br>Point | NRCS<br>Depth [in] | Additional Snow Depth Along Snowcourse [cm] |         |        |         |       |
|---------------------|--------------------|---------------------------------------------|---------|--------|---------|-------|
|                     |                    | (−5m)                                       | (−2.5m) | center | (+2.5m) | (+5m) |
| 1                   | 76.5               | 211                                         | 205     | 195    | 180     | 177   |
| 2                   | 82                 | 186                                         | 187     | 183    | 196     | 205   |
| 3                   | 75.5               | 206                                         | 203     | 210    | 215     | 224   |
| 4                   | 82                 | 183                                         | 184     | 182    | 179     | 180   |
| 5                   | 82                 | 234                                         | 233     | 204    | 199     | 166   |
| 6                   | 85                 | 192                                         | 216     | 235    | 254     | 269   |
| 7                   | 105.5              | 230                                         | 232     | 224    | 201     | 174   |
| 8                   | 89                 | 208                                         | 227     | 235    | 176     | 245   |
| 9                   | 75                 | 229                                         | 210     | 221    | 221     | 220   |
| 10                  | 81.5               | 229                                         | 219     | 200    | 207     | 180   |

**Table S4.** Directional snow depth measurements taken around the Joe Wright SNOTEL snow pillow (station number 05J37S/551) on (a) 2 June 2011 and (b) 4 June 2011.

| <b>(a) 2 June 2011 Measurements</b> |                |                |                |
|-------------------------------------|----------------|----------------|----------------|
| <b>Direction</b>                    | <b>3m Away</b> | <b>2m Away</b> | <b>1m Away</b> |
| N                                   | 202            | 219            | 231            |
| NE                                  | 199            | 219            | 240            |
| E                                   | 232            | 238            | 244            |
| SE                                  | 204            | 220            | 229            |
| S                                   | 234            | 236            | 231            |
| SW                                  | 227            | 240            | 232            |
| W                                   | 241            | 235            | 230            |
| NW                                  | 213            | 213            | 231            |
| SNOTEL sonic depth sensor [in]      |                |                | 90.5           |
| <b>(b) 4 June 2011 Measurements</b> |                |                |                |
| N                                   | 230            | 209            | 196            |
| NE                                  | 215            | 207            | 191            |
| E                                   | 235            | 226            | 223            |
| SE                                  | 229            | 207            | 190            |
| S                                   | 215            | 214            | 223            |
| SW                                  | 218            | 229            | 215            |
| W                                   | 217            | 225            | 228            |
| NW                                  | 218            | 202            | 202            |
| SNOTEL sonic depth sensor [in]      |                |                | 86             |
